# Supplementary material for: High-throughput screening of nano-hybrid metal–organic-frameworks for photocatalytic CO2 reduction
Source: Royal Society of Chemistry journal article supplement (doi:10.1039/d4mh00702f), 2024-01-01
Supplement: d4mh00702f1.pdf [file d4mh00702f1.pdf]

Supporting Materials

# High-throughput screening of nano-hybrid metal-organic-frameworks for photocatalytic CO<sub>2</sub> reduction

Moin Khwaja  
Takuya Harada

Figure S1: Types of heterojunctions

Table S1: Software versions

Table S2: Database DFT Functionals

Table S3: Passing inorganic-core materials for reduction to CO

Table S4: Passing inorganic-core materials for reduction to CHOOH

Table S5: Passing inorganic-core materials for reduction to CH<sub>4</sub>

Table S6: Passing MOF-shell materials for reduction to CO

Table S7: Passing MOF-shell materials for reduction to CHOOH

Table S8: Passing MOF-shell materials for reduction to CH<sub>4</sub>

Figure S1: Types of heterojunctions

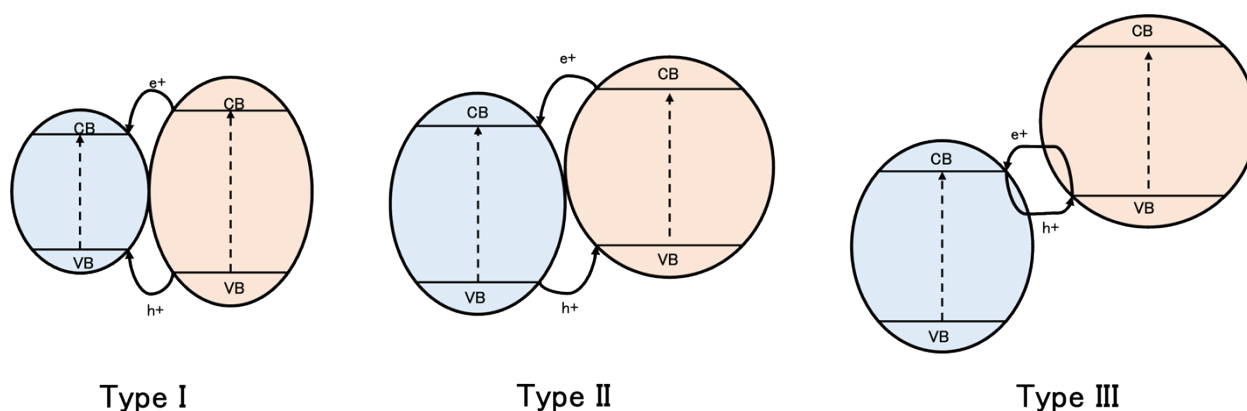

Showcasing the three types of heterojunctions that can occur between two semiconductors.

Table S1: Software version

| Software          | Version    |
|-------------------|------------|
| Materials Project | V2023.11.1 |
| QMOF              | 2021-12-10 |
| MOFSimplify       | 1.0.0      |

Table S2: Database DFT Functionals

| Database          | DFT Functionals                                                                                                                                                                                                                                                                                                                                                                                                                                                                                                                                                                    |
|-------------------|------------------------------------------------------------------------------------------------------------------------------------------------------------------------------------------------------------------------------------------------------------------------------------------------------------------------------------------------------------------------------------------------------------------------------------------------------------------------------------------------------------------------------------------------------------------------------------|
| Materials Project | density functional theory calculations were carried out using the Vienna ab initio Simulation Package (VASP). Projector augmented waves pseudopotentials with exchange correlation functionals were used as parameterized by Perdew–Burke–Ernzerhof. Core electrons were modeled with an energy cutoff of 520 eV. A baseline k-point mesh of 1000/(number of atoms in the cell) is used for all computations. Specifically, the Monkhorst-Pack method is used for the k-point choices (with $\Gamma$ -centered for hexagonal cells), and the tetrahedron method is used to perform |

|      |                                                                                                                                                                                                                                                                                                                                                                                                                                                                                                                                                                                                                                                                                                                                                                                                 |
|------|-------------------------------------------------------------------------------------------------------------------------------------------------------------------------------------------------------------------------------------------------------------------------------------------------------------------------------------------------------------------------------------------------------------------------------------------------------------------------------------------------------------------------------------------------------------------------------------------------------------------------------------------------------------------------------------------------------------------------------------------------------------------------------------------------|
|      | the k-point integration. a k-point mesh of 1000 per reciprocal atom (pra) was used.                                                                                                                                                                                                                                                                                                                                                                                                                                                                                                                                                                                                                                                                                                             |
| QMOF | <p>density functional theory calculations were carried out using the Vienna ab initio Simulation Package (VASP) v.5.4.4. Perdew–Burke–Ernzerhof exchange- correlation functional with Grimme’s D3 dispersion correction and Becke–Johnson (BJ) damping was used. A 520 eV plane-wave kinetic energy cutoff was applied with a <i>k</i>-point density of ~1000 per number of atoms, as arranged using Pymatgen 2019.9.16.</p> <p>Gaussian smearing of the band occupancies with a smearing width of 0.01 eV was applied, with extrapolation back to the 0 K limit. Symmetry operations were disabled. The SCF was converged using the “Fast” algorithm, which is a mixture of the Davidson and residual minimization method–direct inversion in the iterative subspace (RMM-DIIS) algorithms</p> |

Table S3: Passing inorganic-core materials for reduction to CO.

| CO              |              |               |          |        |       |                                     |                        |             |
|-----------------|--------------|---------------|----------|--------|-------|-------------------------------------|------------------------|-------------|
| Material number | Material ID  | Composition   | Band Gap | CBM    | VBM   | Gibbs Free at 7pH (Water Stability) | pH stability pass rate | Synthesized |
| 1               | 'mp-9576'    | [K-Sb-Se]     | 2.40     | -0.362 | 2.034 | 0.332                               | 0.7                    |             |
| 2               | 'mp-1205478' | [F-Sb-Se]     | 2.70     | -0.463 | 2.233 | 0.267                               | 0.8                    | yes         |
| 3               | 'mp-1095291' | [Li-Se-Sn]    | 2.35     | -0.412 | 1.937 | 0.480                               | 0.5                    | yes         |
| 4               | 'mp-29420'   | [Cl-Hf-Se]    | 2.17     | -0.256 | 1.919 | 0.494                               | 0.5                    | yes         |
| 5               | 'mp-20310'   | [In-Li-Se]    | 2.47     | -0.249 | 2.224 | 0.269                               | 0.7                    | yes         |
| 6               | 'mp-675710'  | [K-O-U]       | 2.90     | -0.475 | 2.429 | 0.086                               | 1                      |             |
| 7               | 'mp-1181839' | [Cs-Se-Sn-Sr] | 2.46     | -0.151 | 2.314 | 0.458                               | 0.5                    |             |
| 8               | 'mp-1213022' | [Er-O-Rh]     | 2.60     | -0.125 | 2.475 | 0.143                               | 1                      |             |
| 9               | 'mp-30996'   | [Au-Br-Rb]    | 2.43     | -0.155 | 2.275 | 0.376                               | 1                      |             |
| 10              | 'mp-15222'   | [Cu-Nb-Rb-Se] | 2.46     | -0.342 | 2.118 | 0.500                               | 0.5                    |             |
| 11              | 'mp-1227444' | [Bi-Br-O-Pb]  | 2.71     | -0.440 | 2.265 | 0.080                               | 1                      |             |
| 12              | 'mp-1224517' | [Hf-O-Pb-Te]  | 2.58     | -0.408 | 2.170 | 0.103                               | 1                      |             |
| 13              | 'mp-626218'  | [H-O-Sb]      | 2.82     | -0.214 | 2.602 | 0.137                               | 1                      |             |
| 14              | 'mp-27175'   | [F-In-O]      | 2.68     | -0.163 | 2.513 | 0.102                               | 1                      | yes         |
| 15              | 'mp-1821'    | [Se-W]        | 2.25     | -0.259 | 1.988 | 0.217                               | 0.6                    | yes         |
| 16              | 'mp-1025549' | [Se-Tl-V]     | 2.41     | -0.173 | 2.238 | 0.141                               | 0.8                    | yes         |
| 17              | 'mp-27852'   | [Cl-Hg-Te]    | 2.85     | -0.178 | 2.674 | 0.145                               | 0.8                    |             |
| 18              | 'mp-505700'  | [In-K-Se]     | 2.35     | -0.135 | 2.219 | 0.210                               | 0.7                    | yes         |
| 19              | 'mp-559257'  | [Ag-O-Te]     | 2.76     | -0.148 | 2.614 | 0.144                               | 1                      | yes         |

Table S4: Passing inorganic-core materials for reduction to HCOOH.

| HCOOH           |              |                 |          |        |       |                                     |                        |             |
|-----------------|--------------|-----------------|----------|--------|-------|-------------------------------------|------------------------|-------------|
| Material number | Material ID  | Composition     | Band Gap | CBM    | VBM   | Gibbs Free at 7 pH(Water Stability) | pH stability pass rate | Synthesized |
| 1               | 'mp-555027'  | [Bi-Cd-Ge-O]    | 3.00     | -0.008 | 2.989 | 0.036                               | 1                      | yes         |
| 2               | 'mp-1205997' | [F-Na-U]        | 2.89     | -0.021 | 2.872 | 0.267                               | 1                      |             |
| 3               | 'mp-17972'   | [F-Hg-O-Zn]     | 2.51     | -0.113 | 2.396 | 0.391                               | 1                      | yes         |
| 4               | 'mp-645663'  | [Br-Mo-Se-Te]   | 2.29     | -0.028 | 2.258 | 0.234                               | 0.7                    | yes         |
| 5               | 'mp-1112940' | [Ag-Cl-Cs-Sb]   | 2.97     | -0.002 | 2.965 | 0.308                               | 1                      |             |
| 6               | 'mp-13595'   | [F-Rb-U]        | 2.04     | -0.039 | 2.005 | 0.367                               | 0.8                    | yes         |
| 7               | 'mp-540940'  | [Se-Ti-Tl]      | 2.84     | -0.038 | 2.805 | 0.367                               | 0.7                    | yes         |
| 8               | 'mp-1206763' | [Ba-O-Sc-U]     | 1.97     | -0.026 | 1.939 | 0.274                               | 1                      |             |
| 9               | 'mp-1102254' | [Cs-Ge-Se]      | 2.57     | -0.093 | 2.475 | 0.499                               | 0.5                    | yes         |
| 10              | 'mp-1228258' | [Ba-Li-O-Te]    | 2.68     | -0.034 | 2.650 | 0.297                               | 0.9                    |             |
| 11              | 'mp-756769'  | [C-Na-O-P-Tl]   | 2.93     | -0.105 | 2.821 | 0.223                               | 1                      |             |
| 12              | 'mp-694961'  | [Na-Nd-O-Sr-Ti] | 2.40     | -0.022 | 2.382 | 0.123                               | 1                      |             |
| 13              | 'mp-1207110' | [K-Nb-O-Ta]     | 2.55     | -0.057 | 2.488 | 0.137                               | 1                      |             |

Table S5: Passing inorganic-core materials for reduction to CH<sub>4</sub>.

| CH <sub>4</sub> |              |                 |          |       |       |                                     |                        |             |
|-----------------|--------------|-----------------|----------|-------|-------|-------------------------------------|------------------------|-------------|
| Material number | Material ID  | Composition     | Band Gap | CBM   | VBM   | Gibbs Free at 7 pH(Water Stability) | pH stability pass rate | Synthesized |
| 1               | 'mp-1224154' | [K-O-P-Pd]      | 2.97     | 0.116 | 3.084 | 0.215                               | 1                      |             |
| 2               | 'mp-29359'   | [Cl-Na-Pd]      | 2.99     | 0.084 | 3.074 | 0.368                               | 1                      | yes         |
| 3               | 'mp-1223088' | [Cu-La-O-S-Se]  | 2.15     | 0.165 | 2.320 | 0.418                               | 0.7                    |             |
| 4               | 'mp-10559'   | [Au-Gd-O]       | 2.74     | 0.093 | 2.830 | 0.317                               | 0.8                    | yes         |
| 5               | 'mp-1214066' | [Ag-Ca-F-Hf]    | 2.72     | 0.151 | 2.872 | 0.212                               | 1                      |             |
| 6               | 'mp-1025252' | [Cl-Cs-Mn]      | 2.94     | 0.028 | 2.966 | 0.424                               | 1                      |             |
| 7               | 'mp-1194963' | [O-P-Pd-Tl]     | 2.87     | 0.124 | 2.996 | 0.218                               | 1                      | yes         |
| 8               | 'mp-28145'   | [Cl-Pd-Rb]      | 2.75     | 0.026 | 2.778 | 0.402                               | 1                      | yes         |
| 9               | 'mp-546672'  | [Bi-I-La-O]     | 2.12     | 0.043 | 2.163 | 0.208                               | 1                      | yes         |
| 10              | 'mp-1214730' | [Ba-Ca-Cu-F-Ga] | 3.00     | 0.001 | 2.997 | 0.212                               | 1                      |             |
| 11              | 'mp-1210192' | [Br-Fe-Na]      | 1.92     | 0.142 | 2.066 | 0.468                               | 0.6                    |             |
| 12              | 'mp-571648'  | [Cl-Mn-Rb]      | 2.63     | 0.016 | 2.644 | 0.434                               | 1                      | yes         |
| 13              | 'mp-1219278' | [O-Pb-Sb-Sc]    | 2.35     | 0.143 | 2.497 | 0.053                               | 1                      |             |
| 14              | 'mp-1104024' | [Cs-Ge-Se]      | 2.57     | 0.115 | 2.685 | 0.377                               | 0.7                    | yes         |
| 15              | 'mp-13676'   | [O-P-Tl]        | 2.44     | 0.026 | 2.461 | 0.313                               | 1                      | yes         |
| 16              | 'mp-1018891' | [Cl-Pd]         | 2.32     | 0.141 | 2.461 | 0.376                               | 1                      | yes         |
| 17              | 'mp-1226577' | [Ce-O-Th]       | 2.86     | 0.053 | 2.913 | 0.018                               | 1                      |             |
| 18              | 'mp-3879'    | [Ba-Cu-F]       | 2.85     | 0.150 | 3.004 | 0.248                               | 1                      | yes         |
| 19              | 'mp-505436'  | [Cu-O-P]        | 2.20     | 0.100 | 2.300 | 0.361                               | 0.9                    | yes         |
| 20              | 'mp-1210257' | [F-Na-Ti]       | 1.85     | 0.058 | 1.911 | 0.388                               | 0.9                    | yes         |

|           |              |               |      |       |       |       |     |     |
|-----------|--------------|---------------|------|-------|-------|-------|-----|-----|
| <b>21</b> | 'mp-557993'  | [Bi-O]        | 1.98 | 0.116 | 2.098 | 0.282 | 1   |     |
| <b>22</b> | 'mp-541696'  | [Cl-Cs-Tl]    | 2.97 | 0.064 | 3.037 | 0.359 | 1   | yes |
| <b>23</b> | 'mp-984519'  | [As-Na-Se]    | 2.00 | 0.109 | 2.106 | 0.368 | 0.6 | yes |
| <b>24</b> | 'mp-856'     | [O-Sn]        | 2.69 | 0.037 | 2.727 | 0.000 | 1   | yes |
| <b>25</b> | 'mp-1209628' | [Ga-Rb-Se-Sn] | 2.17 | 0.122 | 2.296 | 0.215 | 0.7 |     |
| <b>26</b> | 'mp-557871'  | [As-Cu-O-Pb]  | 3.00 | 0.093 | 3.091 | 0.066 | 1   | yes |

Table S6: Passing MOF-shell materials for reduction to CO.

| CO           |       |      |       |          |                 |                   |             |     |
|--------------|-------|------|-------|----------|-----------------|-------------------|-------------|-----|
| qmof_id      | PLD   | CBM  | VBM   | Band Gap | Water Stability | Solvent Stability | Synthesized | OMS |
| qmof-2c7948e | 9.59  | 0.16 | -1.64 | 1.81     | 0.92            | 0.92              | yes         | yes |
| qmof-6032da7 | 5.12  | 0.52 | -2.47 | 2.99     | 0.59            | 0.69              | yes         |     |
| qmof-2297abb | 5.01  | 0.65 | -1.73 | 2.39     | 0.64            | 0.88              |             |     |
| qmof-167482e | 4.82  | 0.65 | -1.21 | 1.86     | 0.87            | 0.82              |             |     |
| qmof-def2fe1 | 6.92  | 0.18 | -2.23 | 2.41     | 0.58            | 0.85              |             |     |
| qmof-a40de84 | 4.99  | 0.62 | -2.10 | 2.73     | 0.82            | 0.74              | yes         |     |
| qmof-b050ede | 6.12  | 0.23 | -2.13 | 2.36     | 0.6             | 0.64              |             | yes |
| qmof-44d0651 | 5.89  | 0.35 | -1.88 | 2.23     | 0.65            | 0.55              |             |     |
| qmof-95ce74c | 11.71 | 0.31 | -2.66 | 2.97     | 0.64            | 0.9               | yes         |     |
| qmof-99d7983 | 4.64  | 0.61 | -2.09 | 2.70     | 0.62            | 0.74              | yes         |     |
| qmof-417c826 | 7.22  | 1.24 | -1.46 | 2.70     | 0.79            | 0.78              | yes         |     |
| qmof-3eec122 | 5.02  | 0.79 | -1.04 | 1.83     | 0.73            | 0.88              | yes         |     |
| qmof-b1e5ed5 | 4.67  | 1.18 | -1.58 | 2.76     | 0.56            | 0.93              | yes         |     |
| qmof-bec91df | 5.02  | 0.25 | -2.55 | 2.79     | 0.64            | 0.57              |             |     |
| qmof-cca3b22 | 5.51  | 0.33 | -2.05 | 2.39     | 0.59            | 0.59              |             | yes |
| qmof-096bf27 | 4.54  | 0.86 | -1.50 | 2.37     | 0.72            | 0.79              | yes         |     |
| qmof-97f5f79 | 4.55  | 1.41 | -1.03 | 2.43     | 0.64            | 0.9               | yes         |     |
| qmof-e2185c7 | 4.95  | 0.34 | -1.75 | 2.10     | 0.64            | 0.75              |             | yes |
| qmof-aa8159f | 4.90  | 1.08 | -0.73 | 1.80     | 0.51            | 0.75              | yes         |     |
| qmof-f0c1c90 | 5.10  | 0.15 | -2.75 | 2.90     | 0.54            | 0.82              | yes         |     |
| qmof-55ae928 | 4.89  | 1.11 | -0.68 | 1.78     | 0.56            | 0.75              | yes         | yes |
| qmof-b078db5 | 4.91  | 0.44 | -1.41 | 1.85     | 0.7             | 0.71              |             |     |
| qmof-03dce70 | 4.89  | 1.40 | -1.18 | 2.58     | 0.54            | 0.8               | yes         |     |
| qmof-a758683 | 4.51  | 0.35 | -1.87 | 2.22     | 0.72            | 0.79              |             | yes |
| qmof-ba63d77 | 4.94  | 0.42 | -2.35 | 2.77     | 0.88            | 0.83              |             |     |



|                     |      |      |       |      |      |      |     |     |
|---------------------|------|------|-------|------|------|------|-----|-----|
| <b>qmof-4695aa0</b> | 6.09 | 1.57 | -1.01 | 2.59 | 0.61 | 0.78 |     |     |
| <b>qmof-537f47f</b> | 6.41 | 0.42 | -2.36 | 2.78 | 0.57 | 0.87 |     |     |
| <b>qmof-58a8f42</b> | 5.43 | 0.28 | -2.43 | 2.71 | 0.89 | 0.8  | yes |     |
| <b>qmof-26670ca</b> | 8.81 | 1.06 | -1.76 | 2.83 | 0.88 | 0.62 | yes |     |
| <b>qmof-05cc789</b> | 4.90 | 1.11 | -0.68 | 1.78 | 0.57 | 0.75 | yes | yes |
| <b>qmof-a5a3523</b> | 4.95 | 1.21 | -0.57 | 1.78 | 0.52 | 0.75 | yes |     |
| <b>qmof-8333f8b</b> | 5.09 | 1.09 | -1.12 | 2.20 | 0.64 | 0.78 | yes |     |
| <b>qmof-aa12b02</b> | 5.90 | 0.79 | -1.08 | 1.87 | 0.99 | 0.92 | yes |     |
| <b>qmof-361324a</b> | 5.59 | 0.15 | -2.73 | 2.88 | 0.61 | 0.8  |     | yes |
| <b>qmof-9b8979a</b> | 4.86 | 0.25 | -1.96 | 2.22 | 0.84 | 0.83 |     |     |
| <b>qmof-4581200</b> | 7.35 | 0.34 | -2.56 | 2.90 | 0.7  | 0.51 |     |     |
| <b>qmof-ee8825a</b> | 7.34 | 0.13 | -2.83 | 2.96 | 0.87 | 0.66 | yes |     |
| <b>qmof-b7fb8de</b> | 7.17 | 0.20 | -2.25 | 2.45 | 0.84 | 0.88 | yes |     |
| <b>qmof-8f5113c</b> | 6.26 | 0.48 | -2.32 | 2.80 | 0.84 | 0.89 | yes |     |
| <b>qmof-c1bc002</b> | 6.48 | 0.28 | -1.91 | 2.19 | 0.62 | 0.61 |     |     |
| <b>qmof-c924489</b> | 5.57 | 0.35 | -2.04 | 2.39 | 0.55 | 0.75 |     |     |
| <b>qmof-02d0b18</b> | 7.17 | 0.15 | -2.57 | 2.72 | 0.61 | 0.79 |     |     |
| <b>qmof-31585f8</b> | 6.25 | 0.57 | -2.17 | 2.74 | 0.52 | 0.79 | yes |     |
| <b>qmof-a0717aa</b> | 5.29 | 0.52 | -1.81 | 2.33 | 0.54 | 0.86 | yes |     |
| <b>qmof-5382407</b> | 6.76 | 1.43 | -1.24 | 2.66 | 0.75 | 0.91 | yes |     |
| <b>qmof-d6024b8</b> | 7.16 | 0.22 | -2.70 | 2.93 | 0.65 | 0.79 |     |     |
| <b>qmof-4e43b18</b> | 5.23 | 0.37 | -1.55 | 1.92 | 0.52 | 0.81 | yes |     |
| <b>qmof-2bf3de2</b> | 6.05 | 1.23 | -1.40 | 2.63 | 0.95 | 0.95 | yes |     |
| <b>qmof-ef79893</b> | 5.73 | 1.05 | -1.70 | 2.75 | 0.66 | 0.9  |     | yes |
| <b>qmof-b6953dc</b> | 4.53 | 0.71 | -2.28 | 2.99 | 0.88 | 0.87 |     |     |
| <b>qmof-2095c92</b> | 4.92 | 0.72 | -2.19 | 2.91 | 0.71 | 0.9  |     |     |
| <b>qmof-81886cf</b> | 5.92 | 0.33 | -2.62 | 2.96 | 0.71 | 0.75 |     |     |

|                     |      |      |       |      |      |      |     |     |
|---------------------|------|------|-------|------|------|------|-----|-----|
| <b>qmof-14a36ed</b> | 4.52 | 0.51 | -1.45 | 1.96 | 0.51 | 0.77 |     |     |
| <b>qmof-e2af422</b> | 7.65 | 0.31 | -1.48 | 1.79 | 0.62 | 0.9  | yes | yes |
| <b>qmof-28498f0</b> | 6.79 | 0.44 | -2.10 | 2.55 | 0.59 | 0.62 |     |     |
| <b>qmof-47c6a17</b> | 4.56 | 0.75 | -1.97 | 2.72 | 0.92 | 0.65 | yes |     |
| <b>qmof-f124941</b> | 6.81 | 0.36 | -2.21 | 2.57 | 0.81 | 0.91 | yes | yes |
| <b>qmof-1f7477f</b> | 4.98 | 0.47 | -2.27 | 2.74 | 0.65 | 0.91 | yes |     |
| <b>qmof-25dcace</b> | 4.62 | 0.67 | -1.63 | 2.30 | 0.63 | 0.88 |     |     |
| <b>qmof-e471501</b> | 5.16 | 0.82 | -1.99 | 2.81 | 0.77 | 0.84 |     | yes |
| <b>qmof-f203c62</b> | 6.38 | 0.49 | -2.43 | 2.93 | 0.81 | 0.91 | yes |     |
| <b>qmof-5b5c508</b> | 5.24 | 0.45 | -1.83 | 2.28 | 0.59 | 0.8  |     |     |
| <b>qmof-0f178f1</b> | 4.95 | 1.65 | -0.08 | 1.73 | 0.64 | 0.94 | yes | yes |
| <b>qmof-c1553ca</b> | 4.65 | 0.45 | -2.33 | 2.78 | 0.71 | 0.91 | yes | yes |
| <b>qmof-e2ef939</b> | 6.12 | 0.31 | -2.18 | 2.49 | 0.84 | 0.62 | yes |     |
| <b>qmof-08021a9</b> | 7.00 | 0.55 | -1.71 | 2.26 | 0.58 | 0.95 | yes | yes |
| <b>qmof-96f2489</b> | 5.64 | 0.64 | -1.73 | 2.38 | 0.61 | 0.74 |     |     |
| <b>qmof-f0e967a</b> | 4.96 | 2.19 | 0.44  | 1.75 | 0.54 | 0.88 | yes |     |
| <b>qmof-8b975ac</b> | 4.55 | 0.18 | -2.62 | 2.79 | 0.85 | 0.62 |     |     |
| <b>qmof-e647ae3</b> | 5.10 | 1.09 | -1.57 | 2.65 | 0.58 | 0.9  | yes | yes |
| <b>qmof-961be1d</b> | 5.33 | 0.32 | -2.46 | 2.78 | 0.62 | 0.91 | yes |     |
| <b>qmof-c88e03d</b> | 4.76 | 0.20 | -2.16 | 2.36 | 0.71 | 0.86 |     | yes |
| <b>qmof-f45cbc6</b> | 5.18 | 1.39 | -0.62 | 2.01 | 0.57 | 0.61 |     |     |
| <b>qmof-59219a7</b> | 5.18 | 0.53 | -1.68 | 2.21 | 0.62 | 0.81 | yes | yes |
| <b>qmof-18e2d2f</b> | 4.84 | 0.24 | -2.69 | 2.92 | 0.88 | 0.82 |     |     |
| <b>qmof-5ea5aaa</b> | 5.06 | 0.62 | -1.69 | 2.31 | 0.64 | 0.54 |     |     |
| <b>qmof-8b9a87d</b> | 5.19 | 0.72 | -2.03 | 2.76 | 0.66 | 0.8  | yes | yes |
| <b>qmof-6542f77</b> | 6.18 | 0.88 | -1.53 | 2.41 | 0.57 | 0.84 |     |     |
| <b>qmof-16de531</b> | 6.91 | 0.48 | -2.33 | 2.81 | 0.63 | 0.63 |     |     |

|                     |       |      |       |      |      |      |     |     |
|---------------------|-------|------|-------|------|------|------|-----|-----|
| <b>qmof-c4cc8a9</b> | 4.50  | 0.85 | -2.12 | 2.97 | 0.63 | 0.56 | yes |     |
| <b>qmof-bf9ccaf</b> | 5.29  | 0.52 | -1.26 | 1.78 | 0.77 | 0.87 | yes | yes |
| <b>qmof-1cc623d</b> | 6.41  | 0.51 | -2.23 | 2.75 | 0.57 | 0.92 | yes | yes |
| <b>qmof-918e13a</b> | 5.34  | 0.44 | -2.18 | 2.62 | 0.74 | 0.82 |     | yes |
| <b>qmof-314b14f</b> | 4.84  | 0.41 | -2.44 | 2.85 | 0.51 | 0.85 | yes | yes |
| <b>qmof-7269376</b> | 4.93  | 1.46 | -1.03 | 2.49 | 0.85 | 0.61 | yes |     |
| <b>qmof-b3220dc</b> | 4.60  | 0.35 | -2.56 | 2.90 | 0.84 | 0.73 |     |     |
| <b>qmof-db61142</b> | 4.94  | 1.03 | -0.75 | 1.78 | 0.53 | 0.76 | yes |     |
| <b>qmof-44fa197</b> | 4.53  | 0.60 | -1.14 | 1.74 | 0.83 | 0.82 |     |     |
| <b>qmof-9e05c25</b> | 6.73  | 0.40 | -2.01 | 2.41 | 0.62 | 0.84 |     |     |
| <b>qmof-1749614</b> | 5.48  | 0.14 | -2.77 | 2.91 | 0.73 | 0.75 | yes |     |
| <b>qmof-7d5de5b</b> | 5.08  | 1.45 | -0.87 | 2.32 | 0.63 | 0.85 | yes |     |
| <b>qmof-ef011df</b> | 5.90  | 2.05 | -0.52 | 2.57 | 0.92 | 0.77 | yes |     |
| <b>qmof-4d0c1e9</b> | 5.20  | 0.42 | -2.31 | 2.72 | 0.57 | 0.83 | yes |     |
| <b>qmof-b8bfbdd</b> | 6.08  | 0.82 | -1.51 | 2.33 | 0.62 | 0.64 |     |     |
| <b>qmof-e381eec</b> | 6.67  | 0.24 | -2.38 | 2.62 | 0.66 | 0.89 |     |     |
| <b>qmof-aaa921d</b> | 10.03 | 0.40 | -2.41 | 2.82 | 0.57 | 0.86 | yes | yes |
| <b>qmof-277fc99</b> | 4.74  | 0.19 | -1.94 | 2.14 | 0.64 | 0.75 | yes |     |
| <b>qmof-84d13b7</b> | 5.78  | 0.64 | -2.13 | 2.77 | 0.69 | 0.51 |     |     |
| <b>qmof-28acf7f</b> | 4.51  | 0.59 | -2.05 | 2.64 | 0.53 | 0.97 |     | yes |
| <b>qmof-8169402</b> | 5.63  | 0.61 | -2.19 | 2.80 | 0.69 | 0.85 | yes |     |
| <b>qmof-dbbc93d</b> | 6.84  | 0.21 | -2.53 | 2.74 | 0.53 | 0.92 | yes | yes |
| <b>qmof-9314947</b> | 6.59  | 0.19 | -2.66 | 2.85 | 0.71 | 0.87 |     | yes |
| <b>qmof-e6adc28</b> | 7.65  | 0.35 | -2.03 | 2.38 | 0.78 | 0.91 | yes |     |
| <b>qmof-ed987cc</b> | 6.66  | 0.86 | -1.80 | 2.66 | 0.54 | 0.87 | yes | yes |
| <b>qmof-9ef6fed</b> | 5.59  | 0.15 | -1.92 | 2.07 | 0.52 | 0.73 |     |     |
| <b>qmof-68e1336</b> | 5.59  | 1.29 | -1.35 | 2.64 | 0.94 | 0.95 | yes |     |

|                     |       |      |       |      |      |      |     |     |
|---------------------|-------|------|-------|------|------|------|-----|-----|
| <b>qmof-17e43c6</b> | 4.90  | 1.11 | -0.67 | 1.79 | 0.52 | 0.75 | yes |     |
| <b>qmof-0f515e2</b> | 5.40  | 0.23 | -2.28 | 2.50 | 0.63 | 0.95 |     | yes |
| <b>qmof-3ce4a78</b> | 4.83  | 0.19 | -2.52 | 2.71 | 0.82 | 0.84 |     |     |
| <b>qmof-25172f2</b> | 5.93  | 1.28 | -1.70 | 2.98 | 0.56 | 0.77 |     |     |
| <b>qmof-ba7bac6</b> | 9.52  | 0.72 | -1.95 | 2.67 | 0.88 | 0.62 | yes |     |
| <b>qmof-6a29cfc</b> | 6.77  | 0.13 | -2.37 | 2.50 | 0.64 | 0.76 |     |     |
| <b>qmof-f5056a0</b> | 15.68 | 0.43 | -2.43 | 2.87 | 0.53 | 0.89 |     |     |
| <b>qmof-7c0089b</b> | 5.66  | 1.13 | -1.00 | 2.13 | 0.6  | 0.88 | yes |     |
| <b>qmof-7964502</b> | 4.94  | 0.24 | -2.67 | 2.91 | 0.84 | 0.84 |     |     |
| <b>qmof-0180057</b> | 4.57  | 1.28 | -0.52 | 1.79 | 0.69 | 0.55 | yes | yes |
| <b>qmof-bec2181</b> | 5.00  | 0.41 | -2.57 | 2.98 | 0.54 | 0.85 | yes |     |
| <b>qmof-8ec55e0</b> | 6.25  | 0.99 | -1.67 | 2.66 | 0.6  | 0.84 | yes | yes |
| <b>qmof-d159ad9</b> | 4.52  | 0.92 | -1.03 | 1.94 | 0.85 | 0.86 |     |     |
| <b>qmof-55b32f8</b> | 6.23  | 0.50 | -1.98 | 2.48 | 0.55 | 0.83 | yes | yes |
| <b>qmof-358ca87</b> | 7.16  | 0.40 | -2.45 | 2.85 | 0.62 | 0.58 |     |     |
| <b>qmof-49ea619</b> | 7.36  | 0.28 | -2.47 | 2.75 | 0.64 | 0.84 |     |     |
| <b>qmof-b80a30e</b> | 5.41  | 1.97 | -0.30 | 2.26 | 0.76 | 0.87 | yes |     |
| <b>qmof-648d493</b> | 4.92  | 1.05 | -0.73 | 1.79 | 0.52 | 0.76 | yes |     |
| <b>qmof-0a980e2</b> | 7.18  | 0.31 | -2.53 | 2.84 | 0.61 | 0.88 |     |     |
| <b>qmof-ca4b8ca</b> | 4.53  | 0.51 | -2.07 | 2.58 | 0.84 | 0.74 |     |     |
| <b>qmof-e99de19</b> | 4.90  | 1.11 | -0.67 | 1.79 | 0.54 | 0.75 | yes | yes |
| <b>qmof-5ce2533</b> | 5.69  | 0.33 | -2.33 | 2.65 | 0.57 | 0.82 | yes |     |
| <b>qmof-24fb653</b> | 7.14  | 0.45 | -1.83 | 2.28 | 0.73 | 0.82 |     |     |
| <b>qmof-7163ed4</b> | 6.00  | 0.94 | -1.96 | 2.90 | 0.63 | 0.6  |     |     |
| <b>qmof-62058f7</b> | 8.98  | 0.68 | -2.23 | 2.91 | 0.72 | 0.62 | yes |     |
| <b>qmof-625c1df</b> | 6.09  | 0.38 | -2.10 | 2.48 | 0.84 | 0.79 | yes |     |
| <b>qmof-5b20bb3</b> | 6.44  | 0.62 | -2.15 | 2.77 | 0.56 | 0.87 | yes | yes |

|                     |       |      |       |      |      |      |     |  |
|---------------------|-------|------|-------|------|------|------|-----|--|
| <b>qmof-d77d3f0</b> | 11.25 | 0.29 | -2.64 | 2.94 | 0.64 | 0.9  | yes |  |
| <b>qmof-77442e8</b> | 4.78  | 0.16 | -2.51 | 2.67 | 0.87 | 0.85 |     |  |
| <b>qmof-523c57d</b> | 6.00  | 2.03 | -0.17 | 2.20 | 0.71 | 0.85 | yes |  |
| <b>qmof-18ceb78</b> | 7.19  | 0.35 | -1.97 | 2.32 | 0.62 | 0.84 |     |  |
| <b>qmof-a33f06a</b> | 4.75  | 0.60 | -1.92 | 2.52 | 0.87 | 0.81 |     |  |
| <b>qmof-b66eff0</b> | 7.05  | 0.35 | -2.14 | 2.50 | 0.64 | 0.89 |     |  |

Table S7: Passing MOF-shell materials for reduction to HCOOH.

| HCOOH        |       |      |       |          |                 |                   |             |     |
|--------------|-------|------|-------|----------|-----------------|-------------------|-------------|-----|
| qmof_id      | PLD   | CBM  | VBM   | Band Gap | Water Stability | Solvent Stability | Synthesized | OMS |
| qmof-3b48e5d | 6.90  | 0.10 | -2.69 | 2.78     | 0.81            | 0.7               | yes         |     |
| qmof-38471da | 4.51  | 0.01 | -2.15 | 2.16     | 0.68            | 0.62              |             | yes |
| qmof-c3ad823 | 5.11  | 0.06 | -2.66 | 2.72     | 0.66            | 0.63              |             | yes |
| qmof-bd9ffd3 | 10.80 | 0.10 | -2.71 | 2.81     | 0.63            | 0.77              |             |     |
| qmof-c3298fb | 6.14  | 0.01 | -2.91 | 2.92     | 0.7             | 0.7               |             | yes |
| qmof-3a9ad54 | 5.37  | 0.08 | -2.03 | 2.11     | 0.63            | 0.64              |             |     |
| qmof-60626cd | 4.55  | 0.11 | -2.21 | 2.32     | 0.9             | 0.59              | yes         |     |
| qmof-fa2b07a | 5.31  | 0.01 | -2.64 | 2.65     | 0.76            | 0.79              |             |     |
| qmof-8325046 | 5.22  | 0.01 | -1.95 | 1.96     | 0.56            | 0.7               |             | yes |
| qmof-10b2259 | 6.16  | 0.02 | -2.75 | 2.77     | 0.62            | 0.7               |             | yes |
| qmof-912bab6 | 6.35  | 0.11 | -2.51 | 2.62     | 0.56            | 0.62              |             |     |
| qmof-f62972b | 5.36  | 0.11 | -2.54 | 2.65     | 0.75            | 0.92              |             |     |
| qmof-0bbe221 | 4.98  | 0.03 | -2.68 | 2.70     | 0.63            | 0.95              |             |     |
| qmof-beb185c | 5.34  | 0.03 | -2.37 | 2.40     | 0.73            | 0.56              |             | yes |
| qmof-d192e8d | 7.07  | 0.06 | -1.80 | 1.86     | 0.76            | 0.84              |             |     |
| qmof-077f6af | 5.40  | 0.04 | -2.33 | 2.37     | 0.72            | 0.78              |             | yes |

Table S8: Passing MOF-shell materials for reduction to CH<sub>4</sub>.

| CH <sub>4</sub> |       |       |       |          |                 |                   |             |     |
|-----------------|-------|-------|-------|----------|-----------------|-------------------|-------------|-----|
| qmof_id         | PLD   | CBM   | VBM   | Band Gap | Water Stability | Solvent Stability | Synthesized | OMS |
| qmof-4aba306    | 6.21  | -0.11 | -3.04 | 2.93     | 0.61            | 0.86              | yes         |     |
| qmof-0918da7    | 5.54  | -0.13 | -2.47 | 2.35     | 0.64            | 0.97              |             |     |
| qmof-a7d6d40    | 4.97  | -0.07 | -2.65 | 2.58     | 0.73            | 0.73              |             | yes |
| qmof-7dff4f     | 5.38  | -0.14 | -2.70 | 2.55     | 0.71            | 0.6               |             | yes |
| qmof-53dfad5    | 6.20  | -0.05 | -2.37 | 2.32     | 0.63            | 0.76              |             | yes |
| qmof-150e43b    | 7.66  | -0.16 | -2.61 | 2.45     | 0.61            | 0.8               |             |     |
| qmof-3e2b99e    | 5.14  | -0.05 | -2.67 | 2.62     | 0.74            | 0.8               |             | yes |
| qmof-c906a20    | 5.94  | -0.02 | -2.55 | 2.53     | 0.59            | 0.59              |             | yes |
| qmof-1ed0c50    | 4.93  | -0.06 | -2.76 | 2.71     | 0.73            | 0.89              |             |     |
| qmof-25d399e    | 21.78 | -0.11 | -3.02 | 2.92     | 0.54            | 0.94              |             |     |
| qmof-819df1b    | 5.15  | -0.06 | -2.89 | 2.84     | 0.77            | 0.73              |             | yes |
| qmof-f48c59c    | 7.68  | -0.01 | -2.99 | 2.97     | 0.67            | 0.87              |             |     |
| qmof-1ad2593    | 5.51  | -0.07 | -2.79 | 2.72     | 0.75            | 0.8               |             | yes |
| qmof-5108c60    | 5.96  | -0.10 | -2.25 | 2.16     | 0.64            | 0.73              | yes         |     |
| qmof-56dbe2b    | 7.33  | -0.13 | -2.67 | 2.54     | 0.59            | 0.68              |             |     |
| qmof-5d740ae    | 4.93  | -0.01 | -2.58 | 2.57     | 0.53            | 0.81              |             | yes |
| qmof-449a0d1    | 21.06 | -0.02 | -2.73 | 2.72     | 0.51            | 0.93              |             |     |
| qmof-502b122    | 5.89  | -0.08 | -2.44 | 2.36     | 0.7             | 0.55              |             | yes |
| qmof-1c25053    | 5.48  | -0.05 | -2.11 | 2.07     | 0.62            | 0.72              |             |     |
| qmof-2531f43    | 7.81  | -0.11 | -2.38 | 2.26     | 0.77            | 0.66              | yes         | yes |
| qmof-0a464a7    | 5.30  | -0.09 | -2.51 | 2.42     | 0.76            | 0.71              |             | yes |
| qmof-594c034    | 7.29  | -0.03 | -2.59 | 2.56     | 0.74            | 0.68              |             | yes |

|                     |       |       |       |      |      |      |     |     |
|---------------------|-------|-------|-------|------|------|------|-----|-----|
| <b>qmof-6bab288</b> | 6.10  | -0.04 | -2.05 | 2.01 | 0.71 | 0.82 |     |     |
| <b>qmof-5bd2003</b> | 6.91  | -0.13 | -2.60 | 2.47 | 0.63 | 0.74 |     |     |
| <b>qmof-7c00823</b> | 5.49  | -0.17 | -3.12 | 2.95 | 0.51 | 0.56 |     |     |
| <b>qmof-54d276d</b> | 6.02  | -0.02 | -2.40 | 2.38 | 0.71 | 0.75 |     | yes |
| <b>qmof-bafdee9</b> | 7.16  | -0.12 | -2.97 | 2.86 | 0.65 | 0.83 |     |     |
| <b>qmof-91b0193</b> | 4.83  | -0.16 | -1.90 | 1.74 | 0.82 | 0.72 | yes |     |
| <b>qmof-d3eb92f</b> | 5.39  | -0.04 | -2.84 | 2.80 | 0.75 | 0.64 |     | yes |
| <b>qmof-2e2337f</b> | 7.50  | -0.09 | -2.54 | 2.45 | 0.65 | 0.8  |     |     |
| <b>qmof-13f8e19</b> | 7.65  | -0.17 | -2.05 | 1.88 | 0.61 | 0.78 |     |     |
| <b>qmof-bbbed4f</b> | 4.69  | -0.12 | -2.95 | 2.83 | 0.81 | 0.7  |     |     |
| <b>qmof-e5b19b5</b> | 6.20  | -0.06 | -3.04 | 2.98 | 0.77 | 0.62 |     | yes |
| <b>qmof-7e0c32f</b> | 8.75  | -0.08 | -2.52 | 2.44 | 0.59 | 0.82 |     |     |
| <b>qmof-0475987</b> | 7.77  | -0.12 | -2.21 | 2.09 | 0.69 | 0.7  |     |     |
| <b>qmof-c2f7da3</b> | 6.24  | -0.06 | -2.50 | 2.44 | 0.67 | 0.76 | yes | yes |
| <b>qmof-2e8198f</b> | 7.12  | -0.15 | -2.69 | 2.53 | 0.6  | 0.63 |     |     |
| <b>qmof-ee62841</b> | 6.38  | -0.01 | -2.92 | 2.91 | 0.72 | 0.75 |     | yes |
| <b>qmof-525ab7b</b> | 4.72  | -0.15 | -3.05 | 2.89 | 0.63 | 0.63 |     |     |
| <b>qmof-c921899</b> | 5.73  | -0.08 | -2.92 | 2.84 | 0.7  | 0.7  |     |     |
| <b>qmof-00eae24</b> | 5.47  | -0.04 | -2.34 | 2.30 | 0.65 | 0.61 |     |     |
| <b>qmof-b7e9d20</b> | 4.98  | -0.01 | -2.91 | 2.90 | 0.85 | 0.85 |     |     |
| <b>qmof-35e0b44</b> | 5.70  | -0.15 | -2.31 | 2.15 | 0.71 | 0.65 |     |     |
| <b>qmof-5a2471d</b> | 11.79 | -0.09 | -1.97 | 1.87 | 0.72 | 0.93 | yes | yes |
| <b>qmof-d292655</b> | 7.61  | -0.10 | -2.51 | 2.40 | 0.61 | 0.64 |     |     |
| <b>qmof-bd7e00b</b> | 5.68  | 0.00  | -2.41 | 2.40 | 0.71 | 0.51 |     |     |
